# Supplementary material
Source: Elsevier journal article supplement (https://www.sciencedirect.com/science/article/pii/S2530018017300835)
Supplement: mmc3 [file S2530018017300835:mmc3.doc]

**Tabla e-1.** Características de las lesiones que motivó la consulta

|  | **n** | **%** |
| --- | --- | --- |
| **Clasificación de Wagner*** |  |  |
| Estadio 1, úlceras superficiales | 231 | 67 |
| Estadio 2, úlceras profundas | 52 | 15 |
| Estadio 3, úlceras profundas con absceso y/o osteomielitis | 50 | 14,5 |
| Estadio 4, gangrena limitada | 12 | 3,5 |
| Estadio 5, gangrena extensa | 0 | 0 |
| **Presencia de isquemia** (ausencia de pulsos distales y/o pruebas diagnósticas confirmatorias**) | 169 | 49 |
| **Grado de infección***** |  |  |
| 0= No infección | 150 | 43,4 |
| 1= Leve | 113 | 32,7 |
| 2= Moderada | 67 | 19,5 |
| 3= Severa | 15 | 4,4 |
| **Clasificación de Texas&** |  |  |
| 1A = úlcera superficial | 81 | 23,5 |
| 1B = úlcera superficial con infección | 37 | 10,7 |
| 1C = úlcera superficial con isquemia | 58 | 16,8 |
| 1D = úlcera superficial con infección e isquemia | 56 | 16,2 |
| 2A = úlcera que penetra en tendón o cápsula | 3 | 0,9 |
| 2B = úlcera que penetra en tendón o cápsula con infección | 26 | 7,5 |
| 2C = úlcera que penetra en tendón o cápsula con isquemia | 5 | 1,4 |
| 2D = úlcera que penetra en tendón o cápsula con infección e isquemia | 17 | 4,9 |
| 3A = úlcera que afecta a hueso y articulaciones | 0 | 0 |
| 3B = úlcera que afecta a hueso y articulaciones con infección | 29 | 8,4 |
| 3C = úlcera que afecta a hueso y articulaciones con isquemia | 1 | 0,3 |
| 3D = úlcera que afecta a hueso y articulaciones con infección e isquemia | 32 | 9,3 |

*Estadio de Wagner, 1-513; **ITB<0,9 o IDB <0,6 o TcPO2 < 30 mm de Hg; *** Grado de infección, 0-314, &Clasificación de Texas13.
